# Supplementary material for: Prodrug-conjugated tumor-seeking commensals for targeted cancer therapy
Source: PubMed Central journal article supplement (PMC11109227; doi:10.1038/s41467-024-48661-y), 2024-05-21
Supplement: 41467_2024_48661_MOESM1_ESM.pdf [file 41467_2024_48661_MOESM1_ESM.pdf]

## Supplementary Information

### Prodrug-Conjugated Tumor-Seeking Commensals for Targeted Cancer Therapy

Haosheng Shen<sup>1,2,3</sup>, Changyu Zhang<sup>4,5</sup>, Shengjie Li<sup>1,6</sup>, Yuanmei Liang<sup>1,2,3,7</sup>, Li Ting Lee<sup>1,2,3</sup>, Nikhil Aggarwal<sup>1,2,3</sup>, Kwok Soon Wun<sup>1,2,3,7</sup>, Jing Liu<sup>8</sup>, Saravanan Prabhu Nadarajan<sup>1,2,7</sup>, Cheng Weng<sup>5</sup>, Hua Ling<sup>1,2,7,#</sup>, Joshua K. Tay<sup>1,2,9</sup>, De Yun Wang<sup>8</sup>, Shao Q. Yao<sup>5</sup>, In Young Hwang<sup>1,2,^,\*</sup>, Yung Seng Lee<sup>1,2,10</sup>, and Matthew Wook Chang<sup>1,2,3,7,\*</sup>

<sup>1</sup> NUS Synthetic Biology for Clinical and Technological Innovation (SynCTI), National University of Singapore, Singapore

<sup>2</sup> Synthetic Biology Translational Research Programme, Yong Loo Lin School of Medicine, National University of Singapore, Singapore

<sup>3</sup> National Centre for Engineering Biology (NCEB), Singapore

<sup>4</sup> Ningbo Institute of Dalian University of Technology, Ningbo, China

<sup>5</sup> Department of Chemistry, National University of Singapore, Singapore

<sup>6</sup> Institute of Translational Medicine, Jiangxi Medical College, Nanchang University, China

<sup>7</sup> Department of Biochemistry, Yong Loo Lin School of Medicine, National University of Singapore, Singapore

<sup>8</sup> Department of Otolaryngology, Infectious Diseases Translational Research Program, Yong Loo Lin School of Medicine, National University of Singapore, Singapore

<sup>9</sup> Department of Otolaryngology-Head and Neck Surgery, National University of Singapore, Singapore

<sup>10</sup> Department of Paediatrics, Yong Loo Lin School of Medicine, National University of Singapore, Singapore

#Present address: Wilmar International Limited, Singapore

^Present address: Food, Chemical and Biotechnology, Singapore Institute of Technology, Singapore

\*Correspondence:

In Young Hwang, [iyhwang@nus.edu.sg](mailto:iyhwang@nus.edu.sg)

Matthew Wook Chang, [bhcmw@nus.edu.sg](mailto:bhcmw@nus.edu.sg)

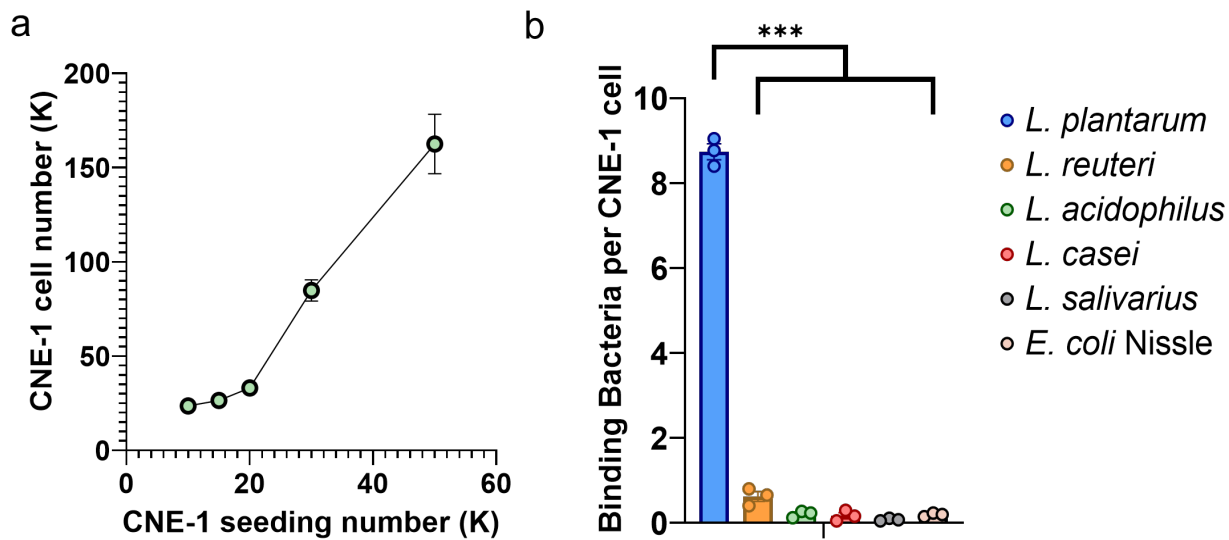

**Supplementary Figure 1.** Binding affinity of *L. plantarum* WCF1 toward NPC cells. a) CNE-1 cell number 24 hours post seeding. n=3 independent CNE-1 cultures. b) Number of bound bacteria per CNE-1 cell in coculture with the CNE-1 cell monolayer. n=3 independent CNE-1 cultures. All Data are presented as mean values +/- SEM. P values *L. plantarum* vs *L. reuteri* =  $3.22 \times 10^{-6}$ , *L. plantarum* vs *L. acidophilus* =  $1.55 \times 10^{-6}$ , *L. plantarum* vs *L. acidophilus* =  $1.78 \times 10^{-6}$ , *L. plantarum* vs *L. salivarius* =  $1.33 \times 10^{-6}$ , *L. plantarum* vs *E. coli* Nissle =  $1.43 \times 10^{-6}$ .

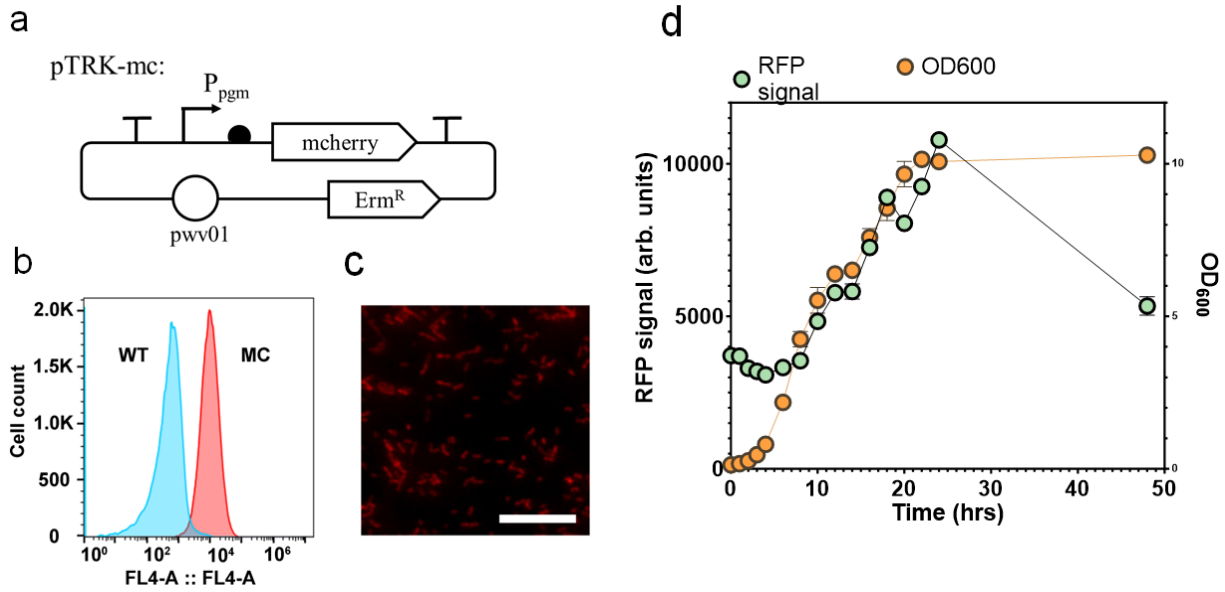

**Supplementary Figure 2.** Expression of mCherry in Lp. a) Expression plasmid for mCherry. b) & c) Flow cytometry analysis (n=10,000 events) and fluorescence microscopy image showing mCherry expression in Lp. Scale bar -- 25  $\mu$ m. d) Growth-dependent expression of mCherry in Lp. n=3 independent Lp cultures. All Data are presented as mean values +/- SEM.

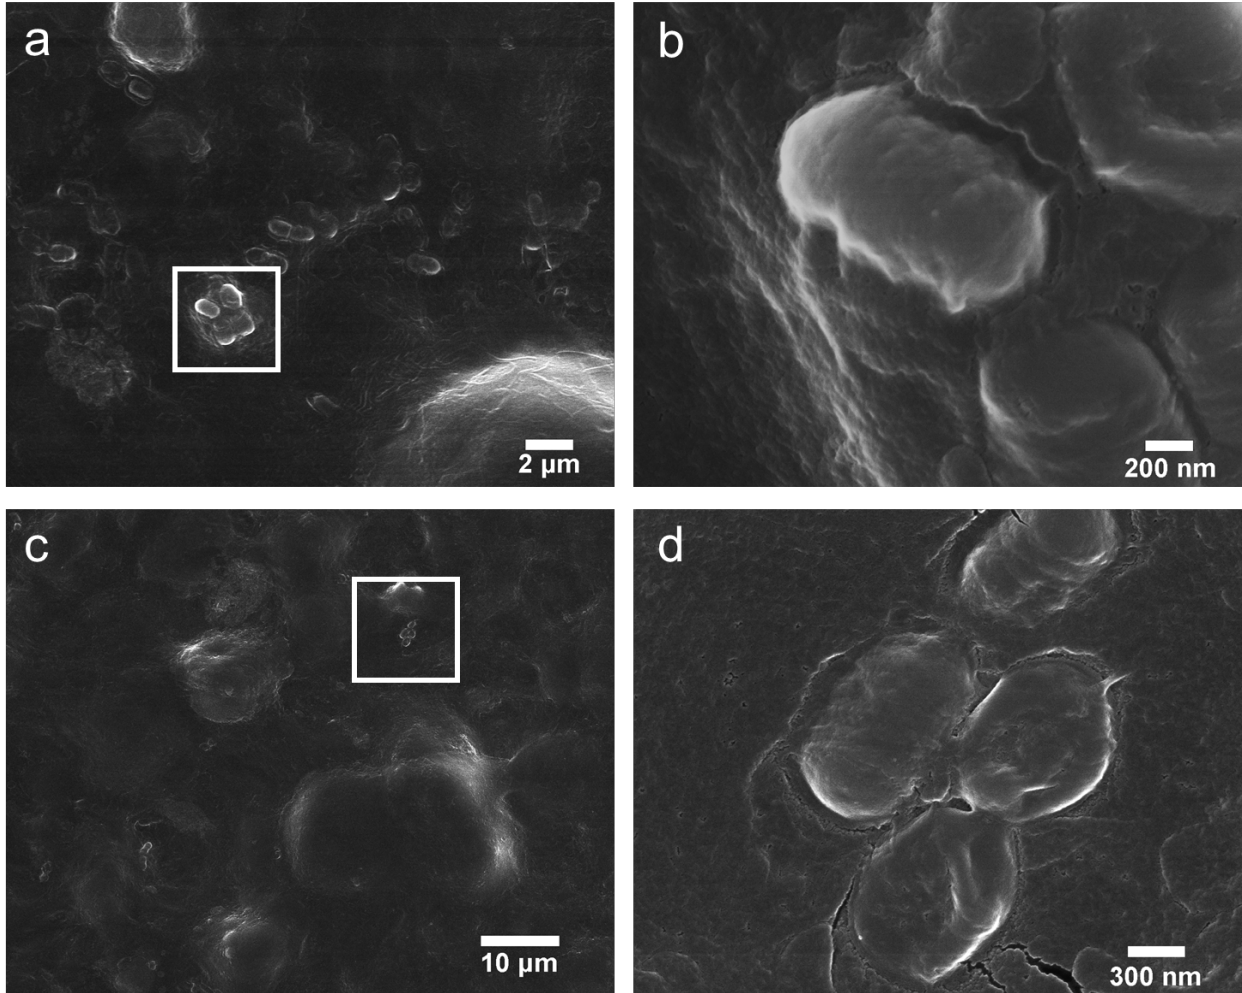

**Supplementary Figure 3.** SEM images of Lp cocultured with the CNE-1 monolayer. a) & c) Lp identified on the surface of CNE-1 cytoplasm at low magnification. b) & d) Presentation of Lp from a) & c) at higher magnification.



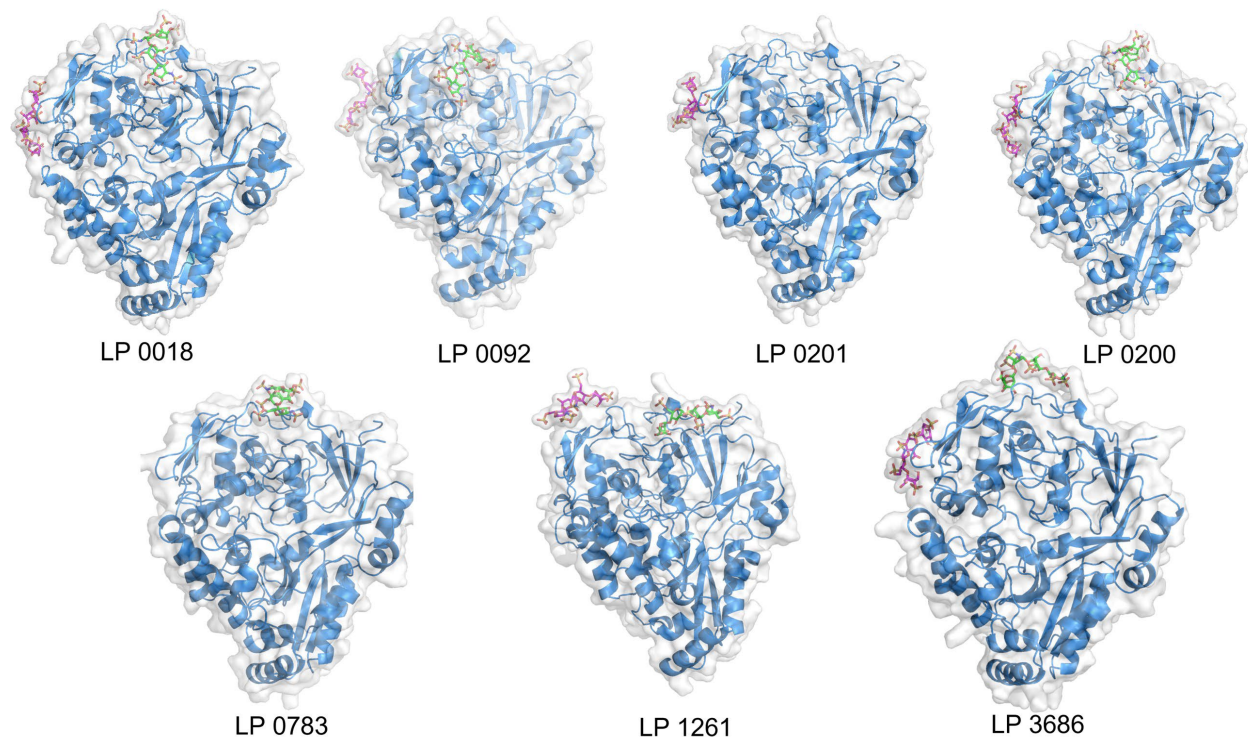

**Supplementary Figure 4:** Docked complexes of different OPPA proteins exerting two different binding modes. Tetramer heparin complexed with OppA proteins at binding modes 1 and 2 are represented as green and magenta sticks, respectively. Protein structures are represented in blue cartoon with white surface representation.

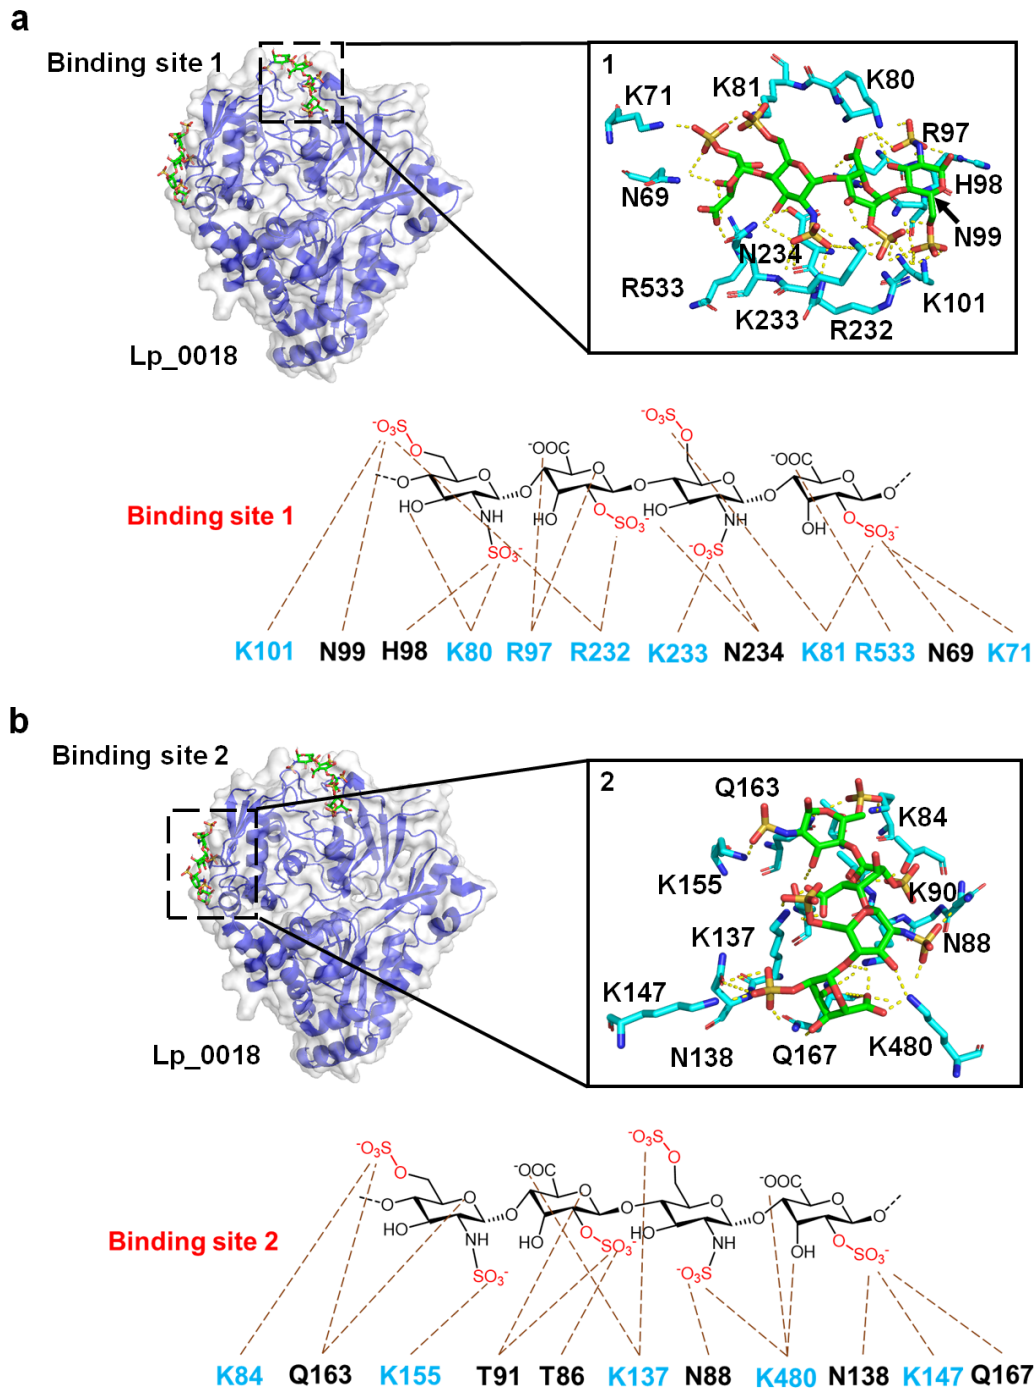

**Supplementary Figure 5:** Hydrogen bond interaction map for the two Lp\_0018-heparin complexes. a) & b) Presentation of Lp\_0018-heparin interaction at two independent binding sites. The three-dimensional structure of Lp\_0018 is demonstrated in the blue ribbon model, and the heparin tetramer is shown in the green stick model. Close interacting amino acids are shown as blue sticks. Hydrogen bonds are shown as dotted lines, with the maximum distance at 3.6 Å.

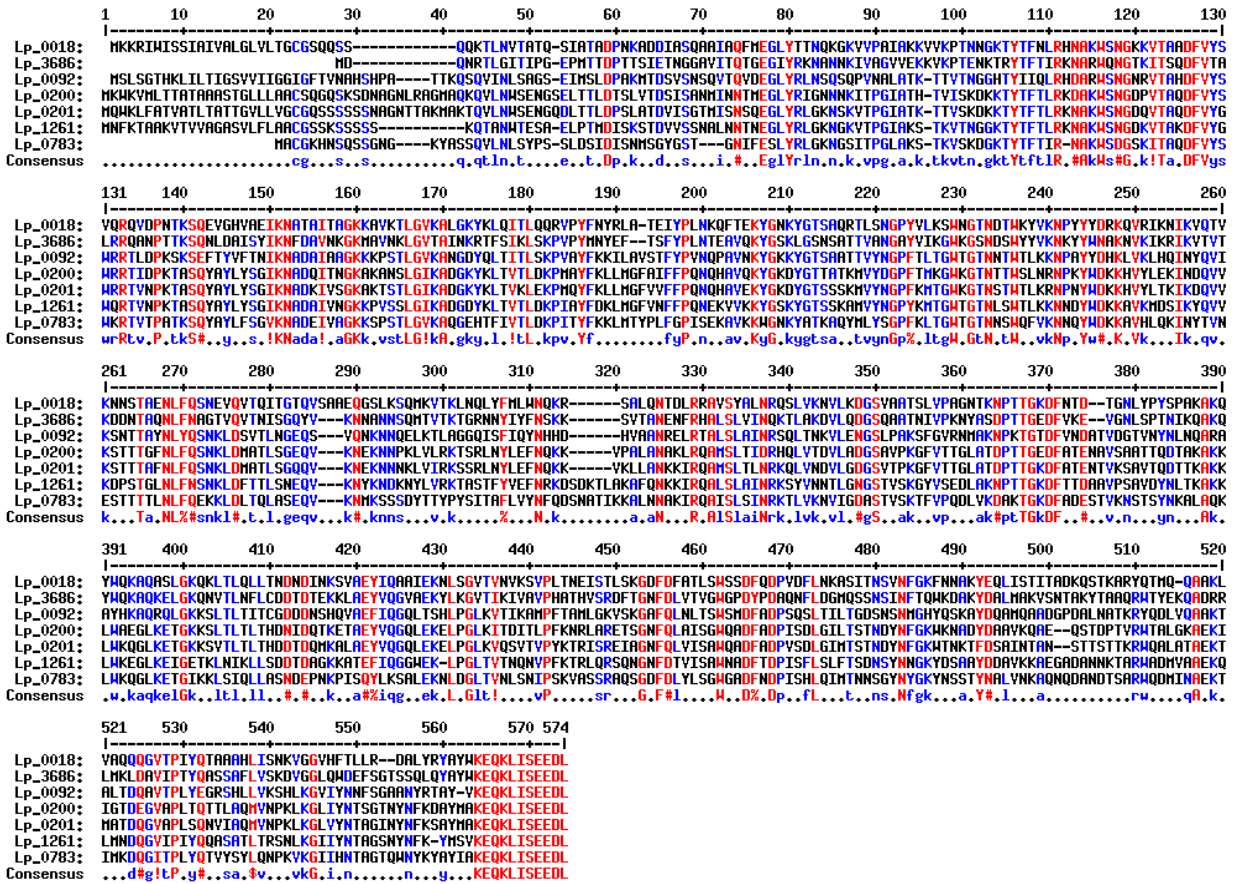

**Supplementary Figure 6:** Multiple sequence alignment of the seven-heparin binding protein. Highly conserved residues are represented as red upper-case letters; weakly conserved residues are represented as blue lower-case letters; and other residues are represented in black.

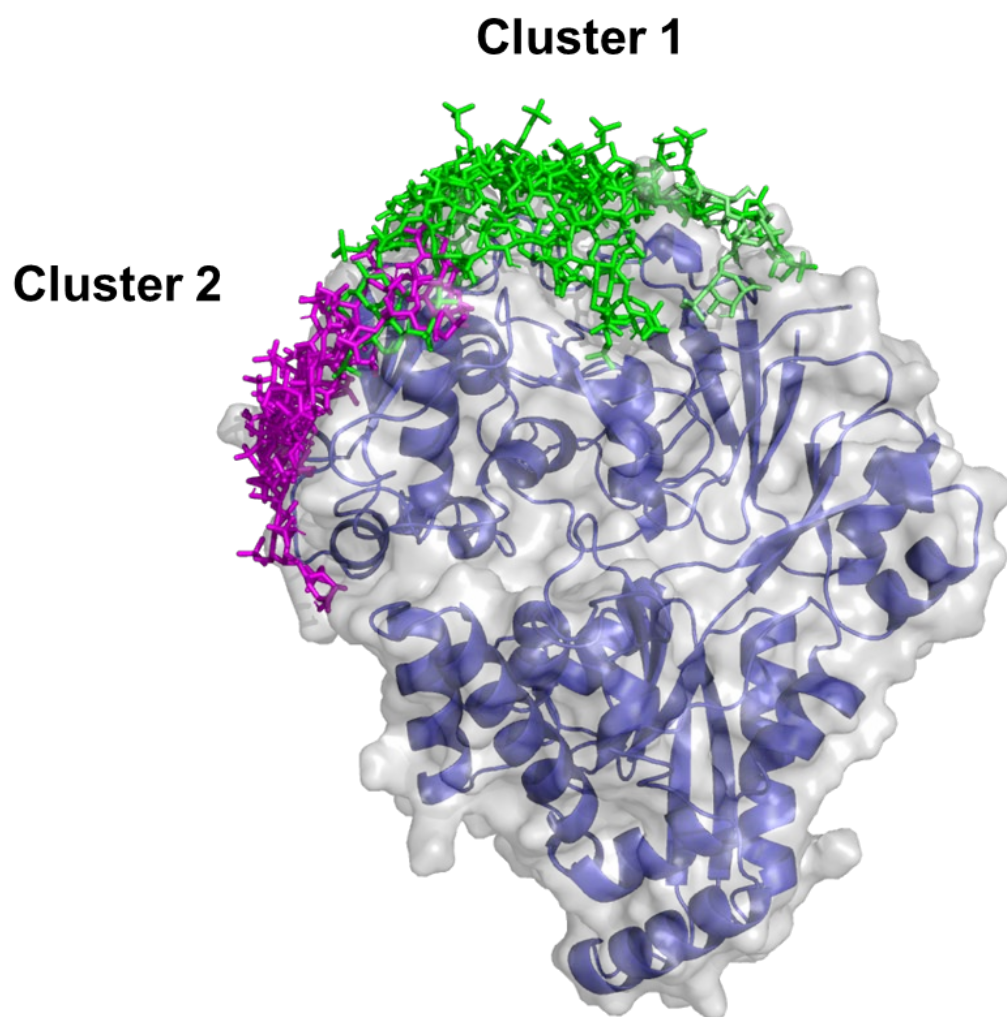

**Supplementary Figure 7:** Superimposed structures of Lp\_0018-heparin complexes demonstrating two possible binding sites.

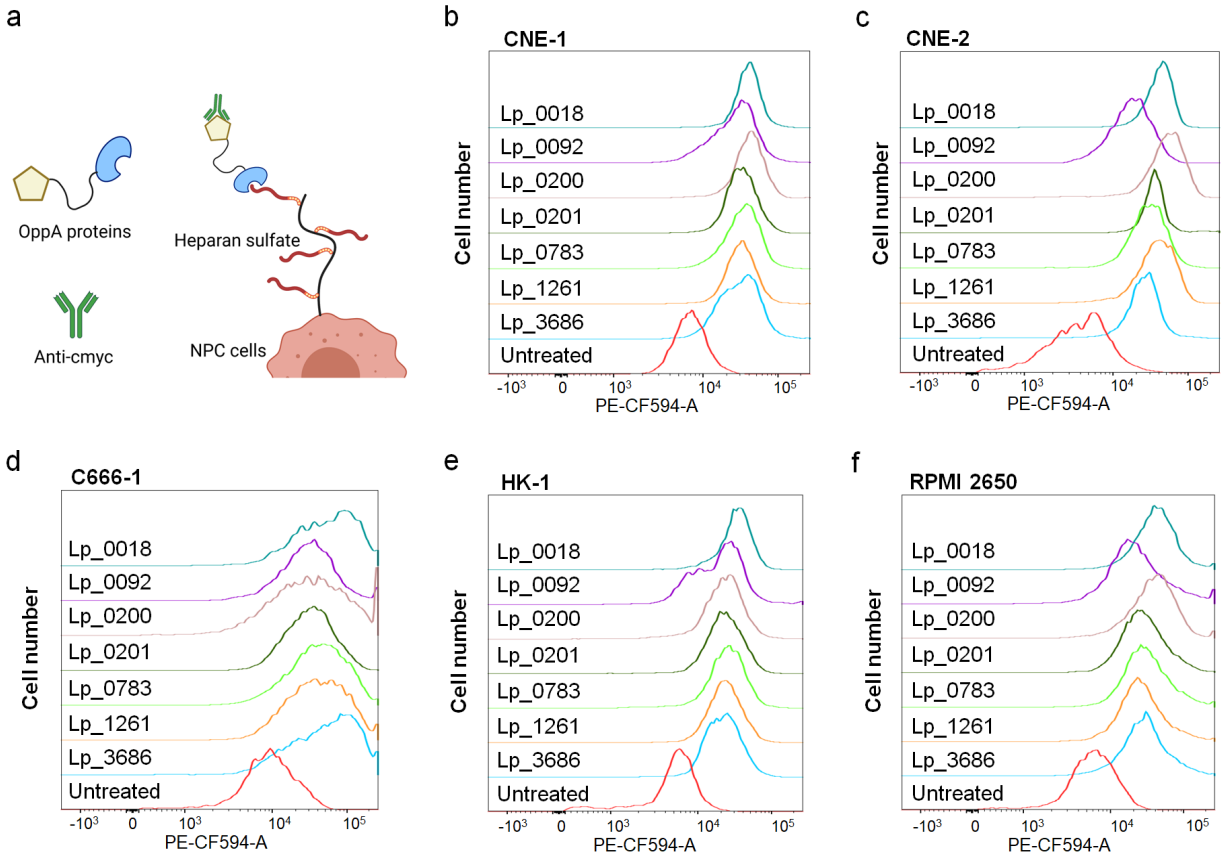

**Supplementary Figure 8.** Flow cytometry analysis of OppA protein binding to NPC cells. a) Schematic diagram showing the detection of OppA proteins bound to NPC cells. b) – f) OppA proteins binding to CNE-1, CNE-2, C666-1, HK-1 and RPMI 2650 cells. Whole cell population was analyzed and the geometric means of the treated cells were used to compare the binding efficacy of OppA proteins to various NPC lines. n=10,000 events.

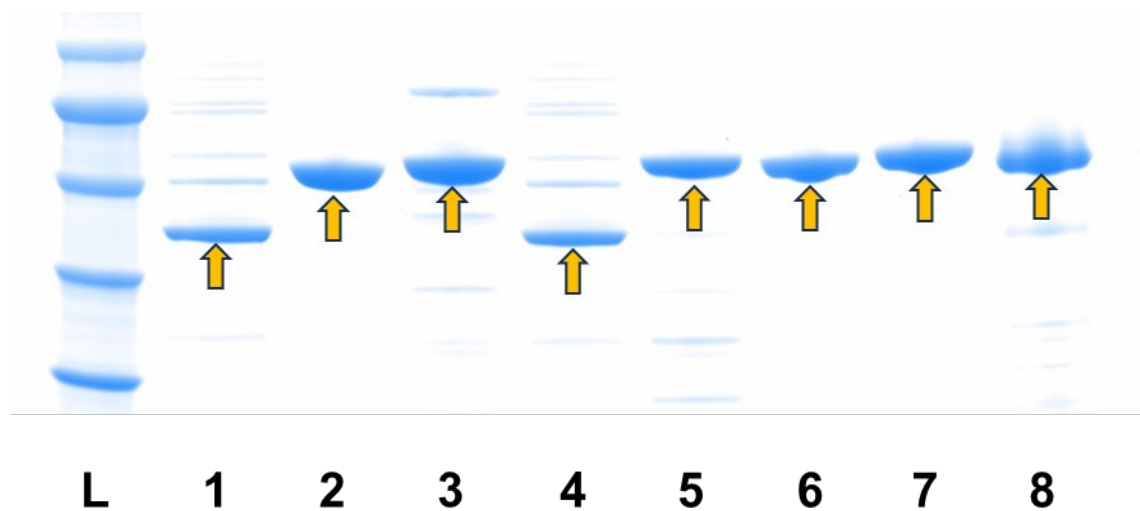

**Supplementary Figure 9.** OppA proteins purified through a heparin affinity column. From lane 1 to 8: Lp\_0018 SBD, Lp\_0018, Lp\_0092, Lp\_0200 SBD, Lp\_0201, Lp\_0783, Lp\_1261, Lp\_3686.



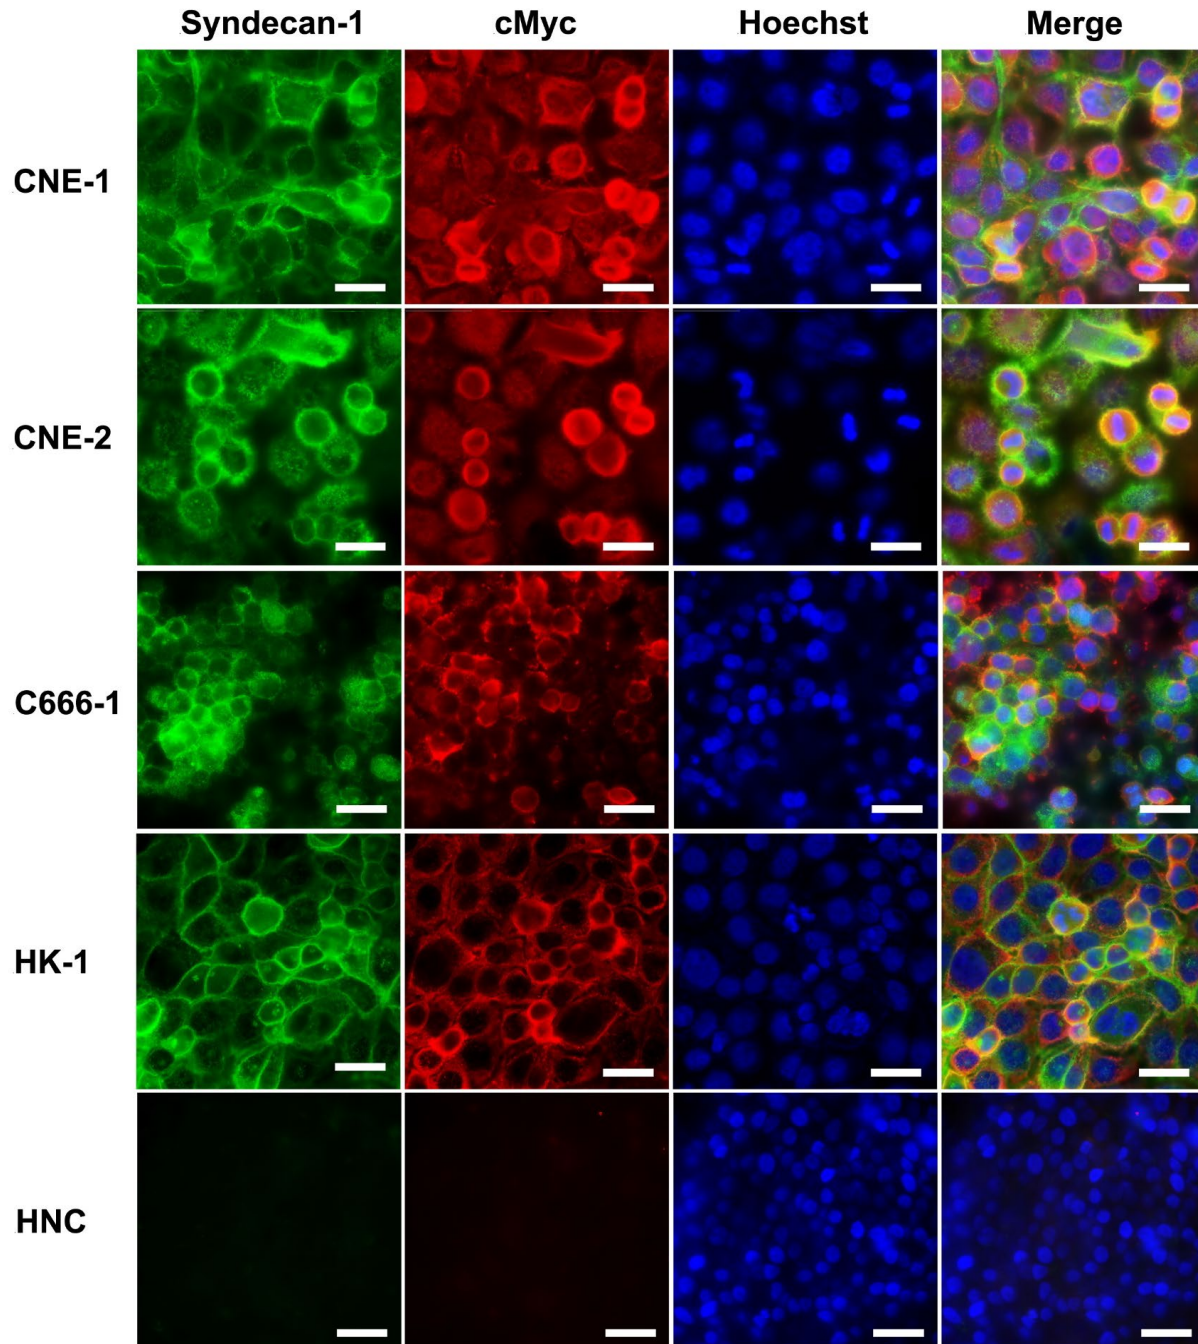

**Supplementary Figure 10.** IF staining showing the expression of syndecan-1 and the binding of Lp\_0018 to NPCs and HNC. Green – syndecan-1, Red – Lp\_0018 stained by anti-cMyc antibody. Blue -- mammalian nucleus stained by Hoechst., Scale bar -- 25  $\mu$ m.

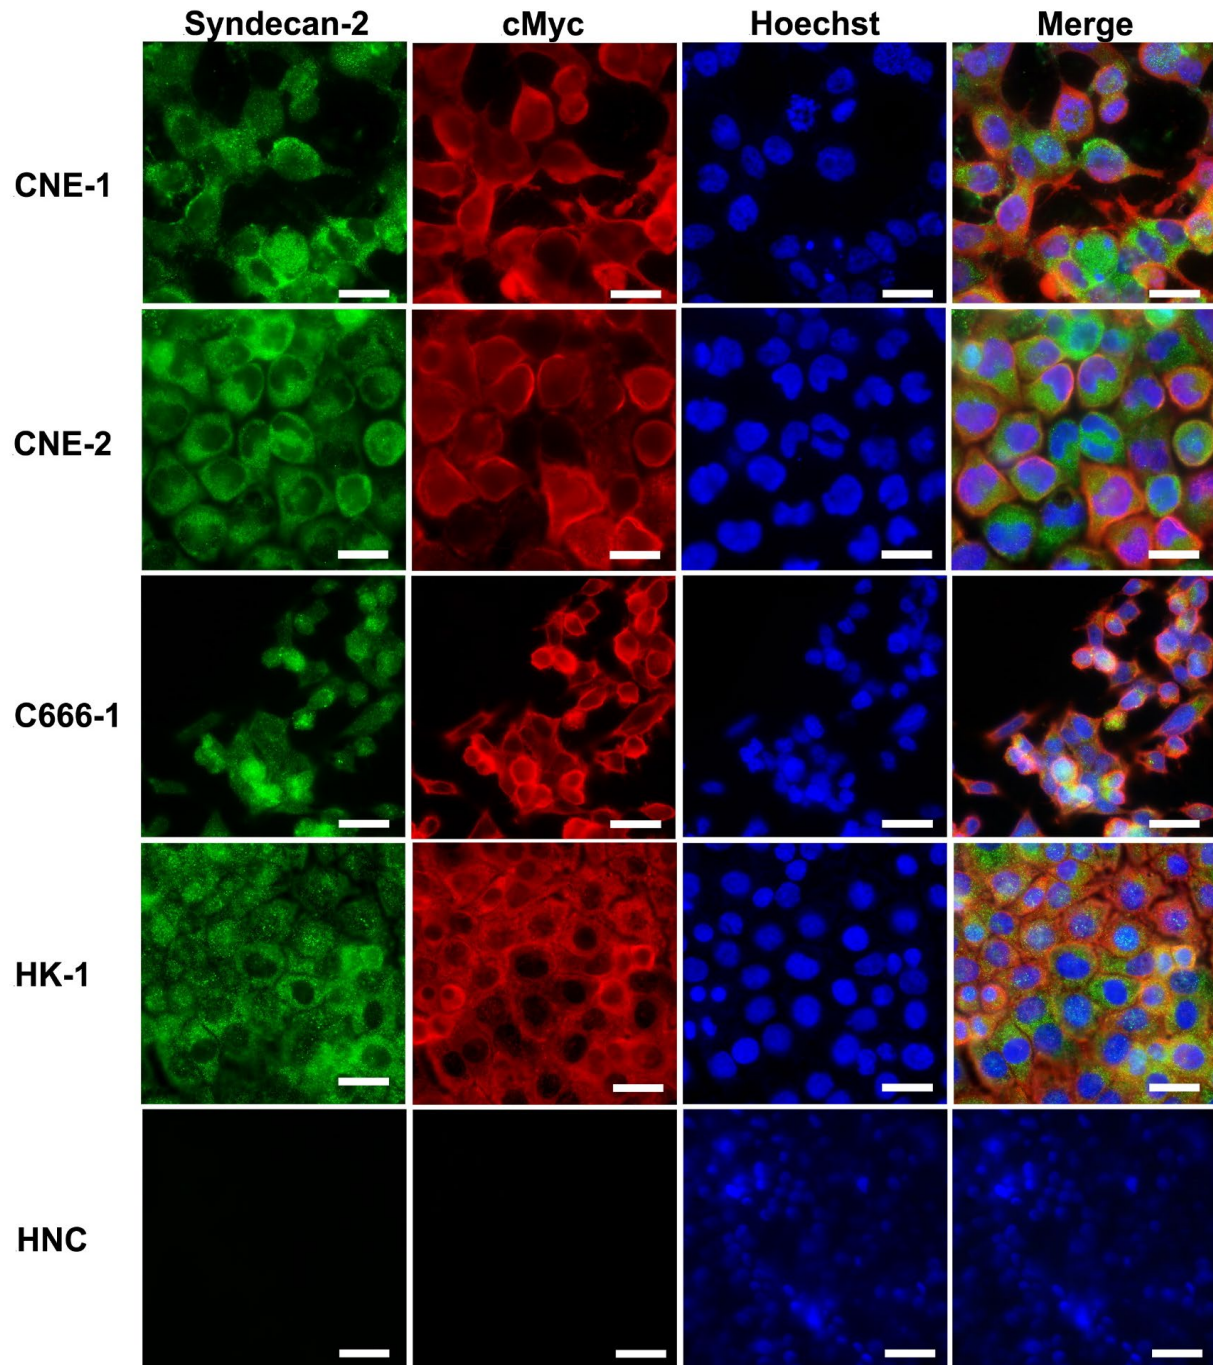

**Supplementary Figure 11.** IF staining showing the expression of syndecan-2 and the binding of Lp\_0018 to NPCs and HNC. Green – syndecan-1, Red – Lp\_0018 stained by anti-cMyc antibody. Blue -- mammalian nucleus stained by Hoechst., Scale bar -- 25  $\mu$ m.





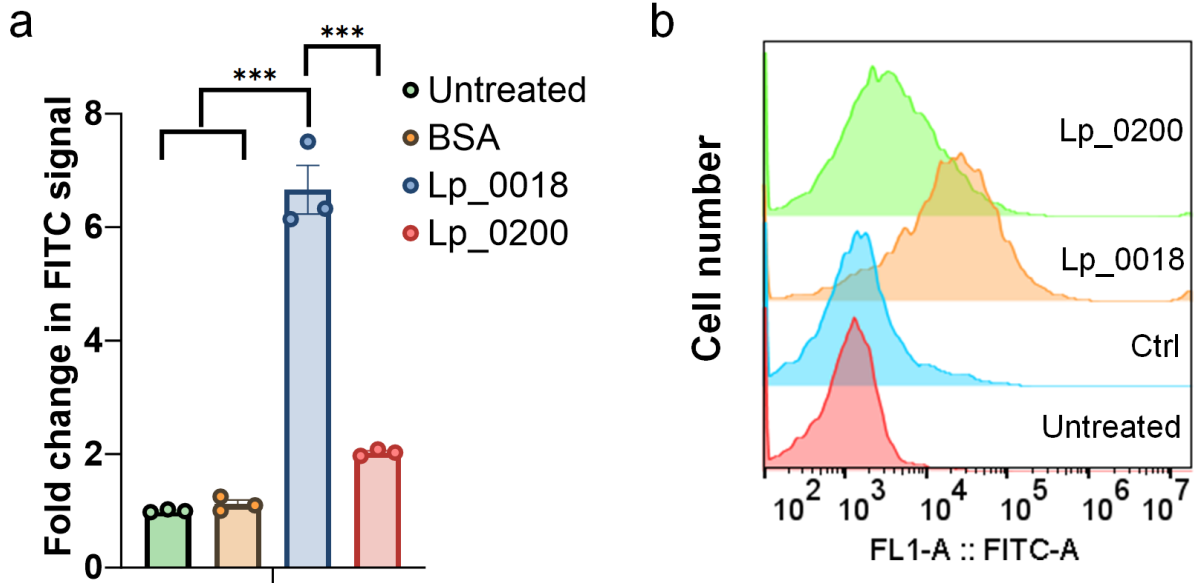

**Supplementary Figure 13.** Enhancement of NPC binding capacity by Lp\_0018 and Lp\_0200 SBD. a) Enhanced binding capacity to CNE-1 cells in Lp via incubation of Lp\_0018 and Lp\_0200. n=3 independent CNE-1 cultures. Data are presented as mean values +/- SEM. (P values Lp\_0018 vs Untreated = 0.0002, Lp\_0018 vs BSA = 0.0002, Lp\_0018 vs Lp\_0200 = 0.0004). b) Flow cytometry analysis showing Lp\_0018 and Lp\_0200 SBD binding to Lp cells. n=10,000 events.

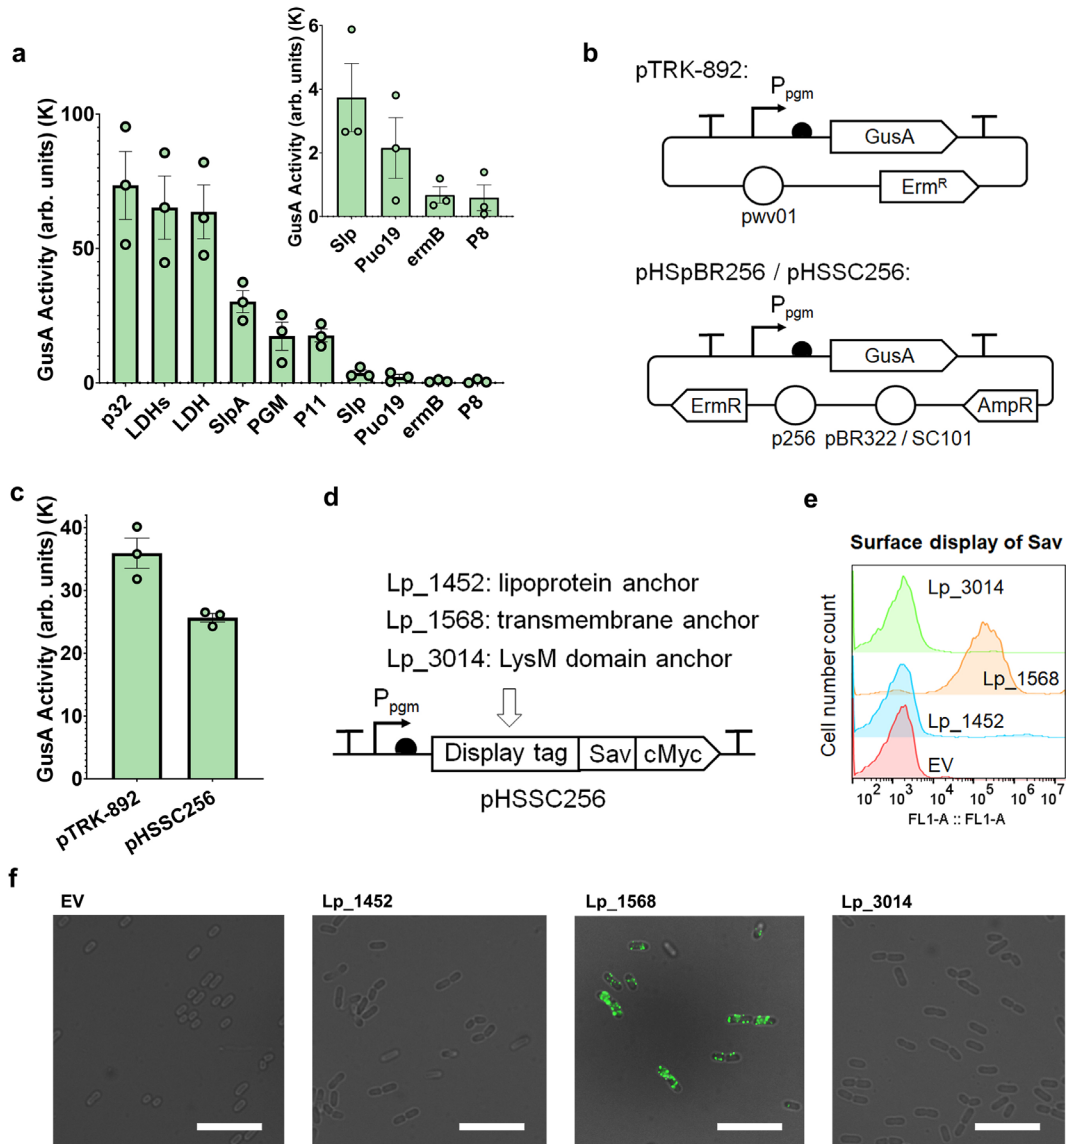

**Supplementary Figure 14.** Surface display of Sav in Lp. a) Promoter library in Lp characterized by *gusA* assay.  $n=3$  independent Lp cultures. b). Replicon 256-based plasmids for genetic manipulation in Lp. c) Comparison of expression strength in pTRK-892 and pHSSC256 plasmids.  $n=3$  independent Lp cultures. d) Expression cassette for surface display of Sav. e) & f) Flow cytometry analysis ( $n=10,000$  events) and IF staining showing successful display of Sav through fusion to the transmembrane protein Lp\_1568. Scale bar, 25  $\mu\text{m}$ . All data are presented as mean values  $\pm$  SEM.

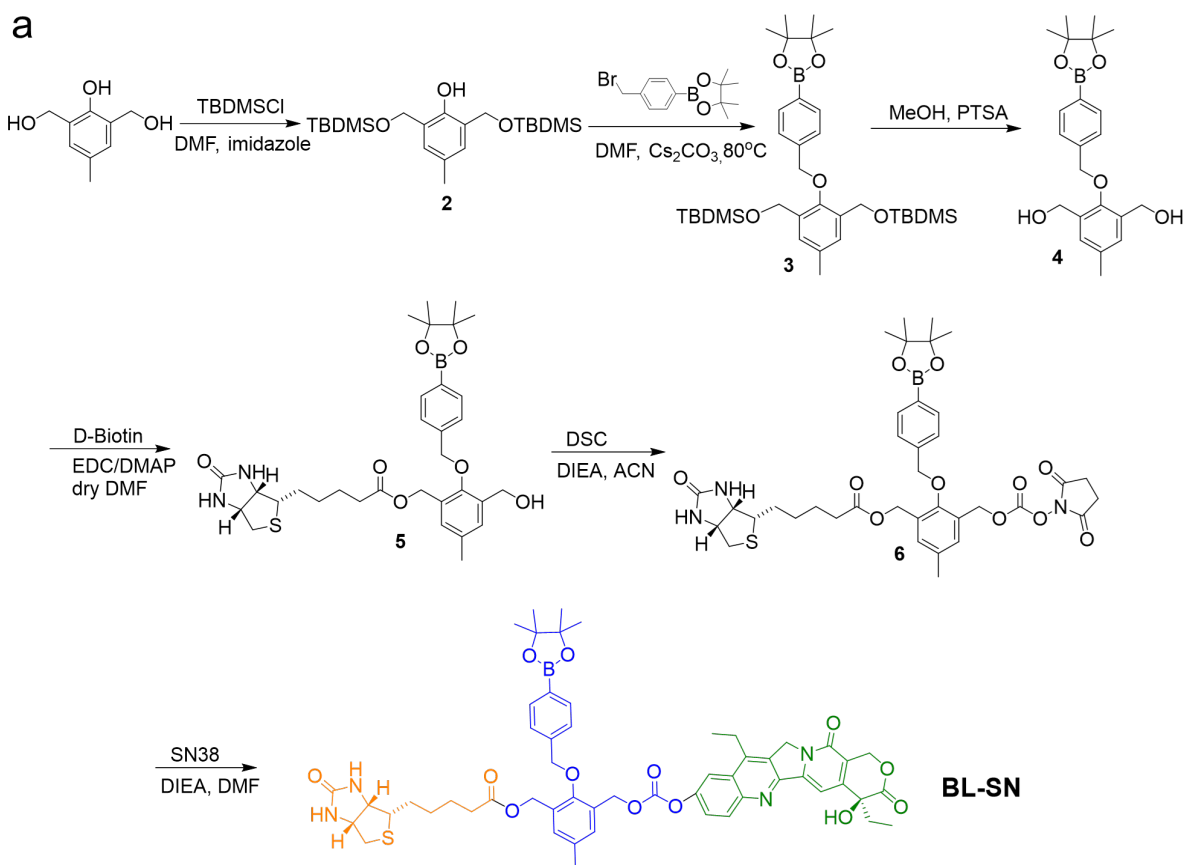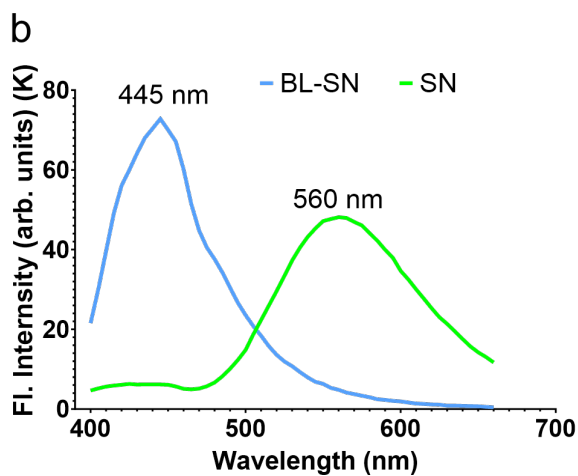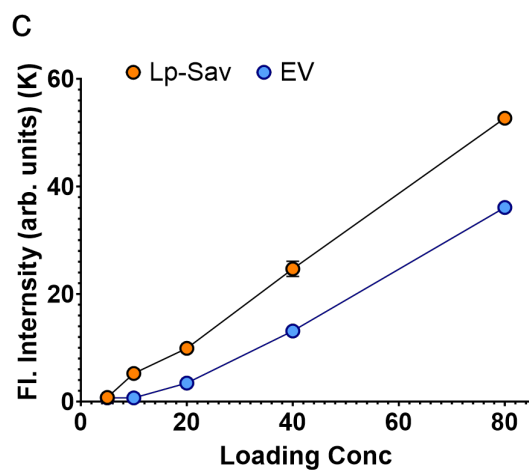

**Supplementary Figure 15.** Synthesis route of BL-SN and loading of BL-SN. a) Schematics showing the synthesis route of BL-SN and the loading of BL-SN. b) Fluorescence spectrum scanning showing the optimal emission wavelengths of BL-SN and SN. c) Loading of BL-SN on the Lp-Sav and EV strains. n=3 independent Lp cultures. Data are presented as mean values +/- SEM.

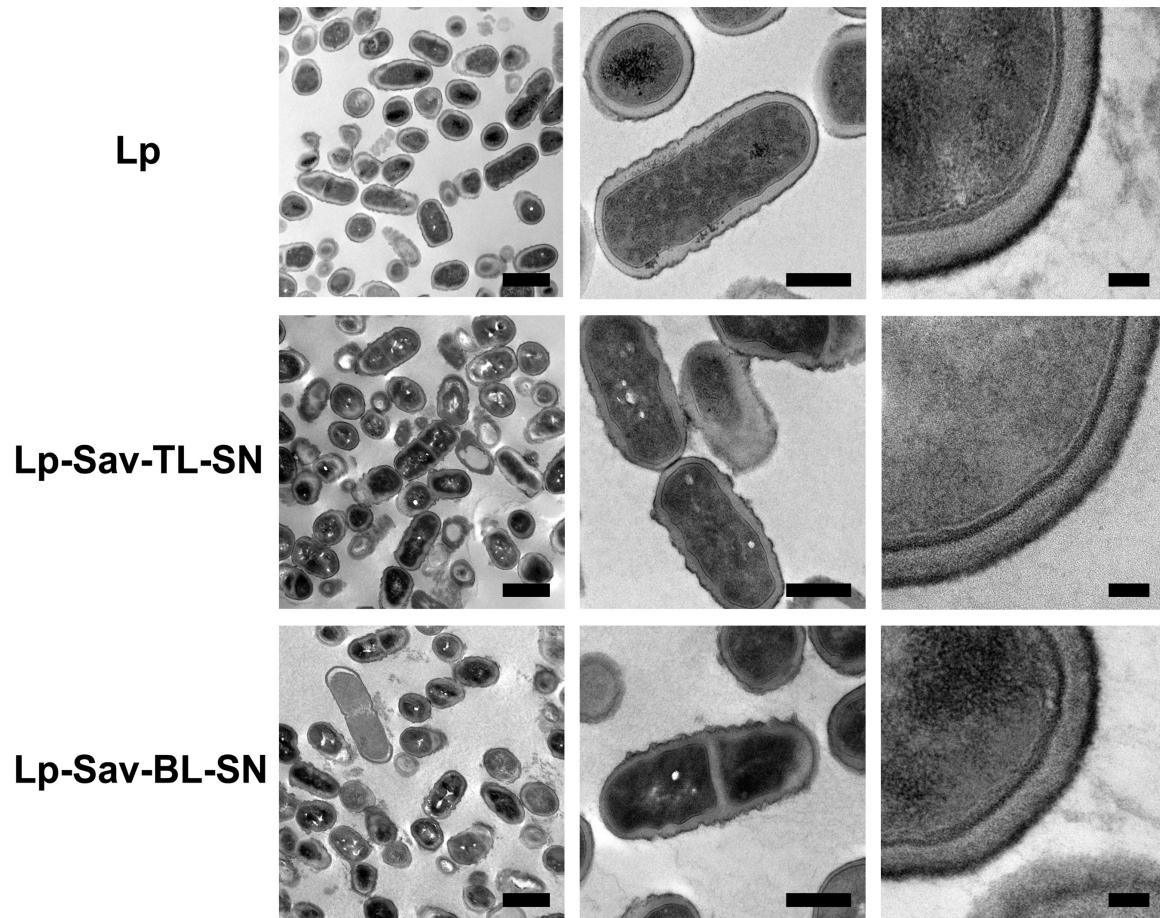

**Supplementary Figure 16.** TEM images showing the membrane structure of Lp, Lp-Sav-TL-SN and Lp-Sav-BL-SN. Scale bars from left to right, 1.0  $\mu\text{m}$ , 200.0 nm, 50.0 nm.

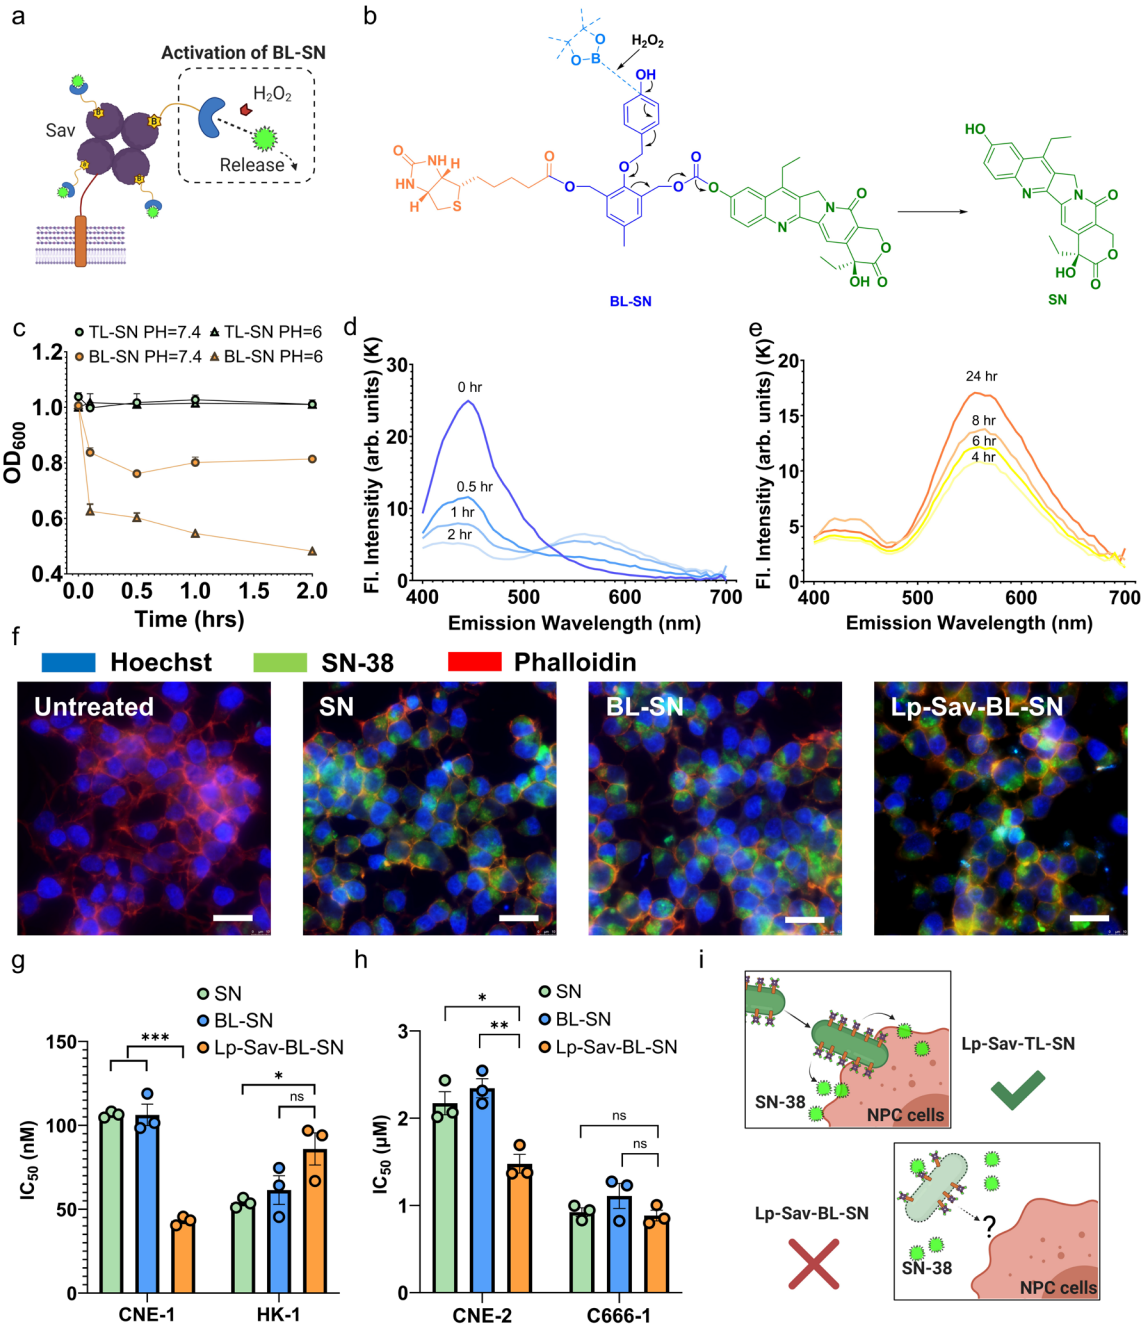

**Supplementary Figure 17.** Release of SN from Lp-Sav-BL-SN and in vitro characterization of Lp-Sav-BL-SN in NPC cells. a) & b) Schematics showing the mechanism of BL-SN activation and SN release. c) Bacterial cell lysis caused by activation of BL-SN. n=3 independent Lp cultures. d) & e) Release of SN from Lp-Sav-BL-SN via  $H_2O_2$  activation detected by fluorescence. f) Accumulation of SN in C666-1 cells after Lp-Sav-BL-SN administration. 24 hours incubation time. Red –  $\beta$ -actin stained by phalloidin. Blue – nucleus stained by Hoechst. Green – SN. Scale bars, 25  $\mu$ m. g) & h)  $IC_{50}$  of various treatments in NPC cells. n=3 independent NPC cultures. (P values in CNE-1 group SN vs Lp-Sav-BL-SN =  $3.99 \times 10^{-6}$ , BL-SN vs Lp-Sav-BL-SN = 0.0007; in HK-1 group 0.0298, 0.1287; in CNE-2 group 0.0151, 0.0048; in C666-1 group 0.6439, 0.2243). i) Schematics showing that the lysis of cells led to nontargeted release of SN in Lp-Sav-BL-SN cells. Data are presented as mean values +/- SEM.

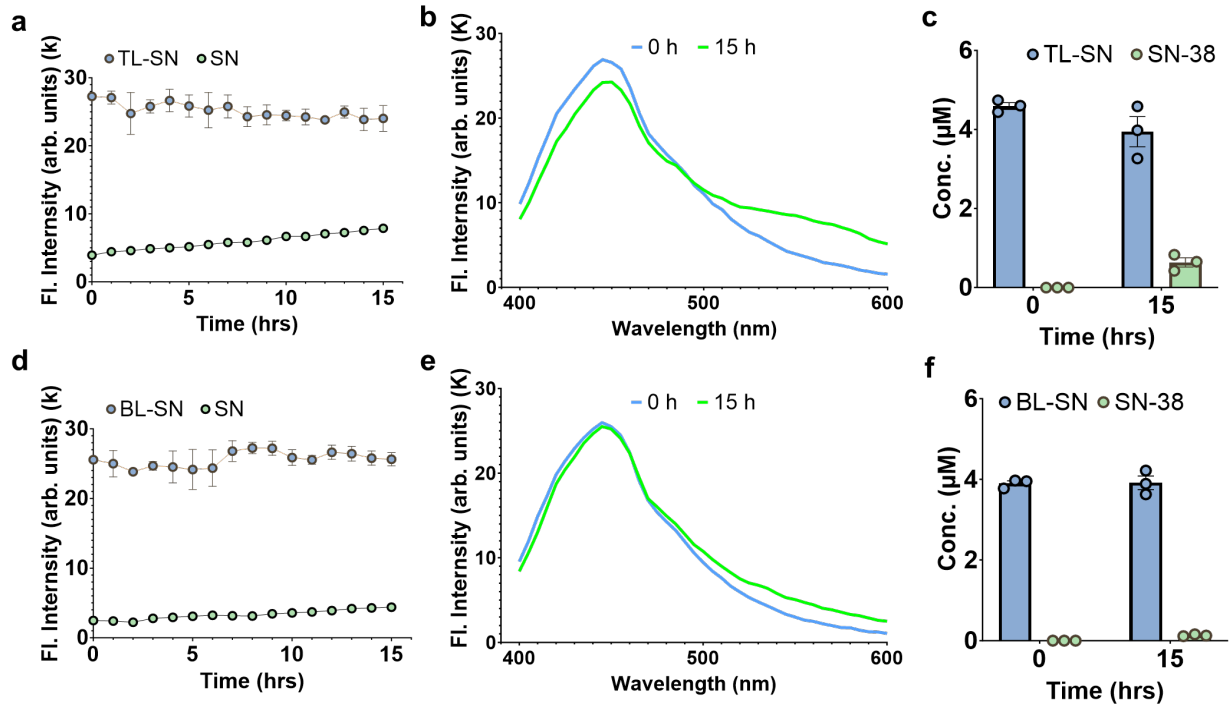

**Supplementary Figure 18.** Stability of Lp-Sav-TL-SN and Lp-Sav-BL-SN in PBS. a) & d) Activation of TL-SN and BL-SN with the release of SN from TL-SN-loaded and BL-SN-loaded Lp-Sav over time, respectively. b) & e) Dynamics of TL-SN and BL-SN activation, respectively by spectrum scanning over time. c) & f) Concentration of TL-SN and BL-SN in the cell pellet, respectively and SN in the supernatant pre- and post-activation. The assays are performed in 3 independent Lp cultures. Data are presented as mean values  $\pm$  SEM.



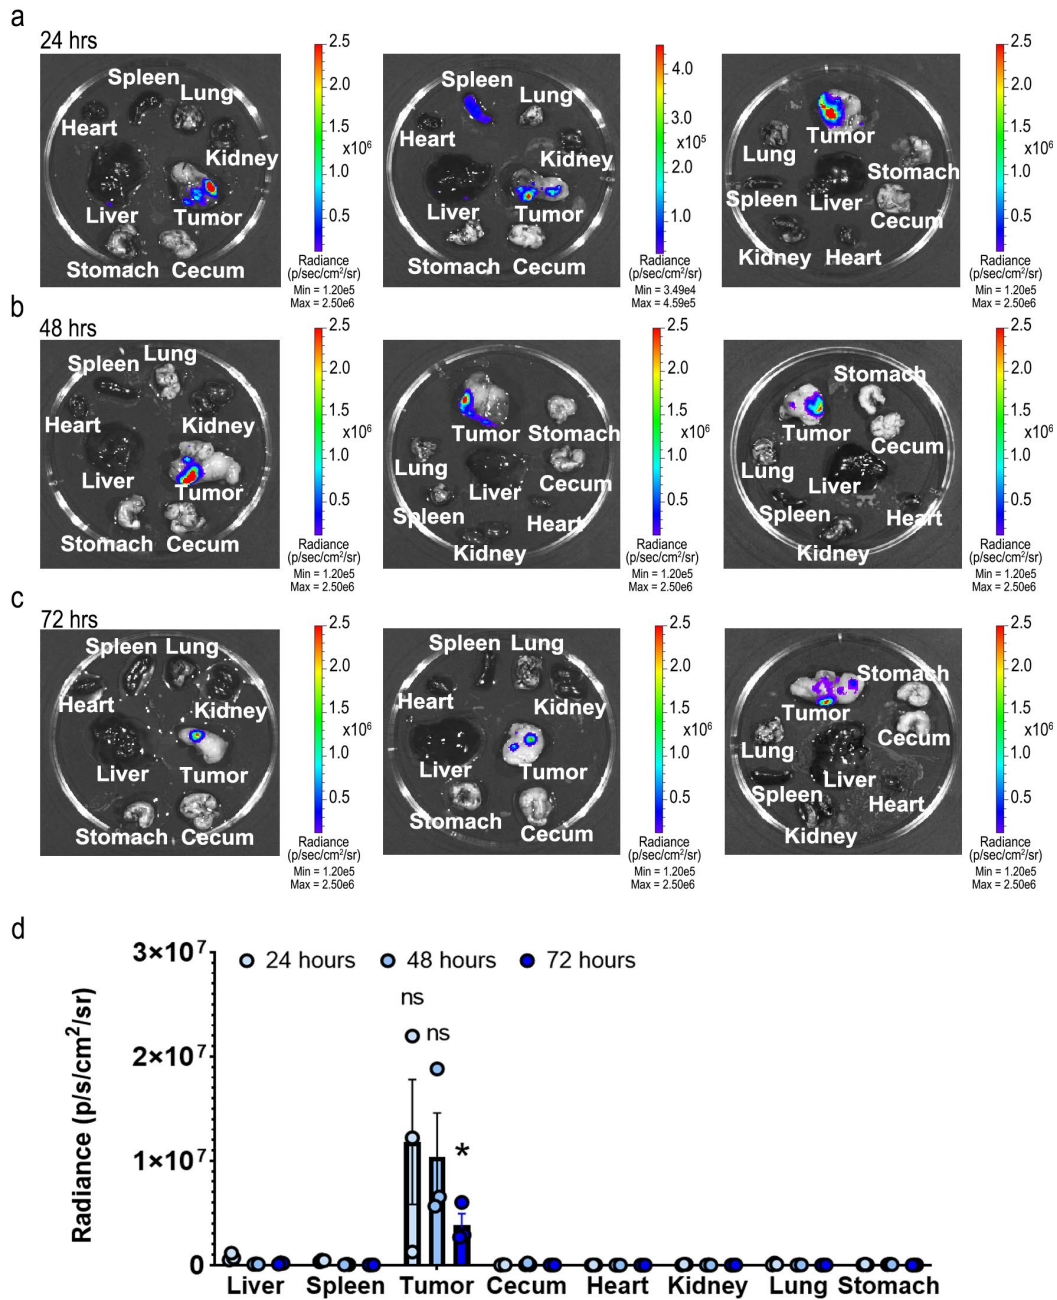

**Supplementary Figure 19.** IVIS analysis of bioluminescent Lp-CB in mouse organs 72 hours post intravenous injection. a), b) & c) IVIS imaging of the mouse organs 24, 48, 72 hours post injection. d) Quantification of bioluminescence from mouse organs 24, 48, 72 hours post injection. n=3 mice. Data are presented as mean values +/- SEM. P values vs Liver = 0.0271, vs Spleen = 0.0240, vs Cecum = 0.0239, vs Heart = 0.0236, vs Kidney = 0.0237, vs Lung = 0.0239, vs Stomach = 0.0239.



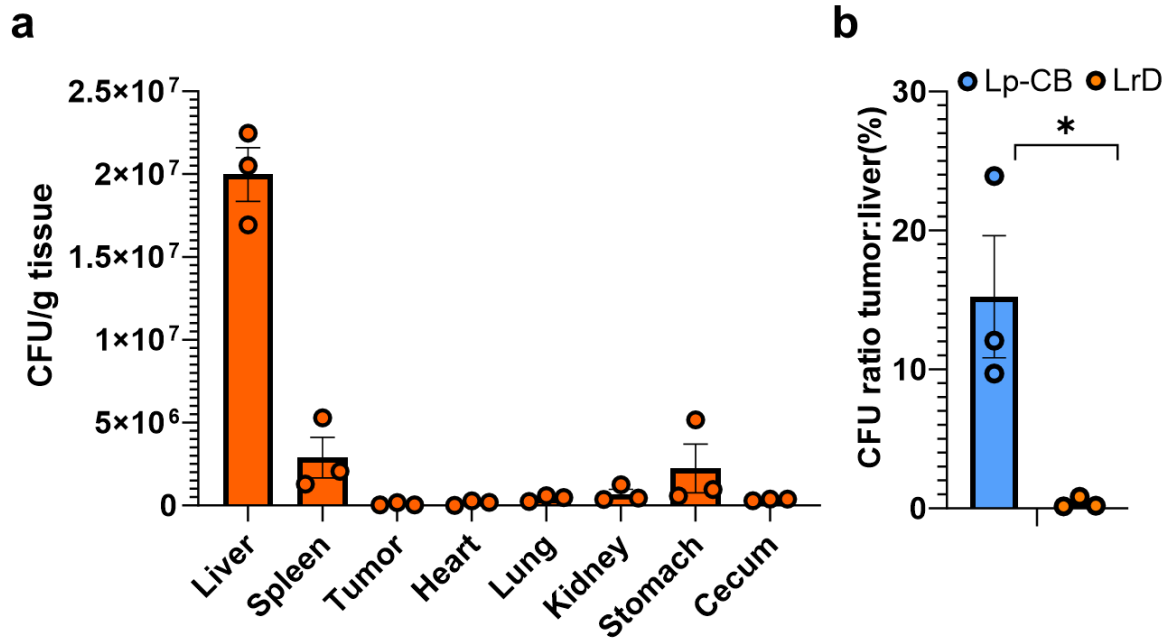

**Supplementary Figure 20.** Biodistribution of LrD in mouse following intravenous injection. a) CFU count of LrD in various organs 24 hour following administration. n=3 mice. b) Tumor-to-liver ratio of Lp-CB and LrD 24 hours postinjection. (p value = 0.0281). n=3 mice. Data are presented as mean values +/- SEM.

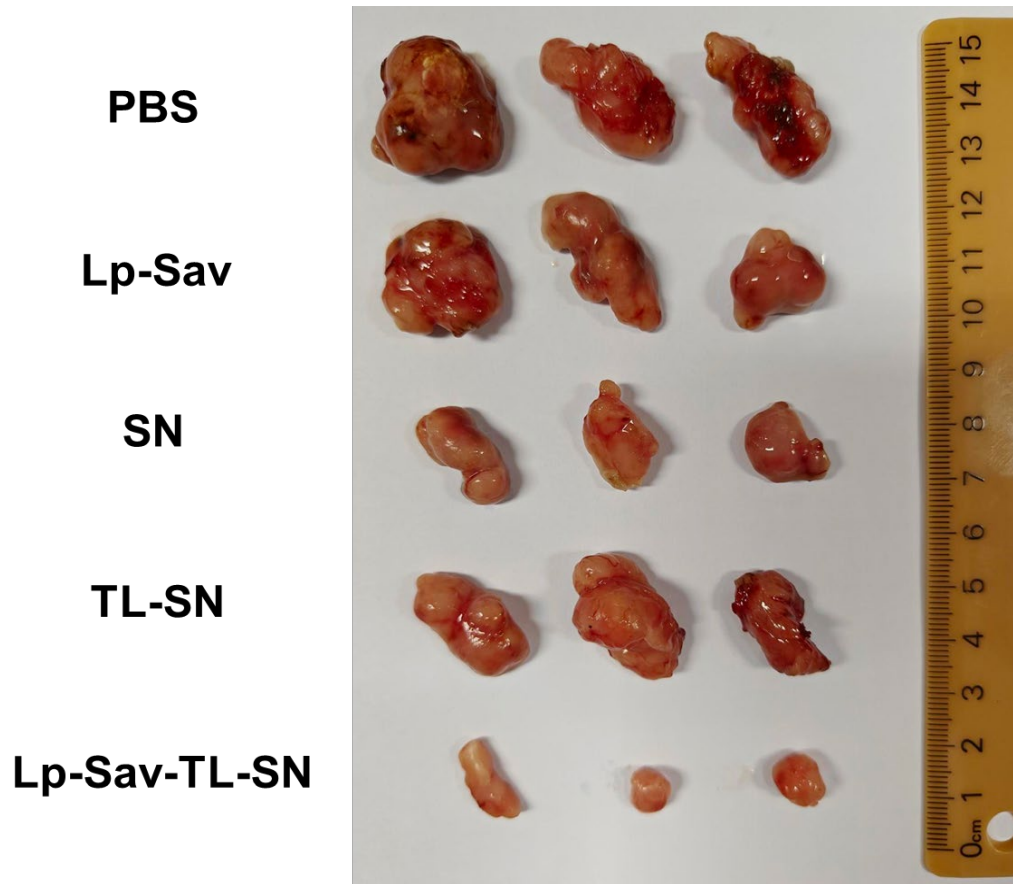

**Supplementary Figure 21.** Representative C666-1 tumors excised from various treatment groups.

**Supplementary Table 1:** Hydrogen bond interacting sites of different Lp\_0018-heparin complexes

| Pose | Binding site | Hydrogen bond interacting side chains                                                                                 |
|------|--------------|-----------------------------------------------------------------------------------------------------------------------|
| 0    | 1            | His98, Lys 80, Asn99, Lys 101, Arg 232, Lys 233, Gln 234, Lys 81, Arg 97, Asn 69, Lys 71, Arg 533, Asp 231            |
| 1    | 1            | Arg97, Asn99, Lys 81, Asn 69, Arg 533, Gln 234, Arg 232, Lys 101, Asp 231, Lys 233, Arg 236.                          |
| 2    | 1            | Arg 232, Arg 97, His98, Lys 80, Asn 99, Lys 81, Lys 233 and lys 101                                                   |
| 3    | 1            | Lys 81, Lys 71, Gln 70, Asn 6, Arg 97, Asn 99, Lys 233, Gln 234, Arg 533, Asp 231                                     |
| 4    | 2            | Lys 480, Lys 147, Gln 167, Lys 155, Gln 163, Asn88, Thr 86, Lys 84, Thr 93, Lys 90, Lys 137, Thr 91, Thr 165, Asn 138 |
| 5    | 1            | Lys 107, Lys 101, Arg 232, Lys 233, Gln 234, Arg 97, Asn99, lys 81, Asp231                                            |
| 6    | 2            | Arg 169, Gln 481, Arg 486, Tyr 172, lys 480, His 132, Lys90, Gln 168, Gln 167, Lys 137, lys 147                       |
| 7    | 1            | Lys 159, lys 161, Asn95, Lys 80, Arg 97, Tyr 160, Lys 101, Lys 107                                                    |
| 8    | 2            | Gln 481, Arg 169, Lys 480, Gln 168, Lys 137, Lys 90, Asn 88, Lys 84, Thr 93, Lys 155, Gln 163, Thr 91                 |
| 9    | 1            | Lys 107, Lys 80, Lys 233, Arg 232, Lys 101                                                                            |
| 10   | 1            | Asn95, Lys 161, Lys 159, Lys 101, His 98, Arg 97, Lys 80                                                              |
| 11   | 1            | Lys 161, Asn 95, Lys80, His 98, Arg 97, Lys 81, Arg 533, Arg 232, Lys 233                                             |
| 12   | 1            | Tyr 160, lys 159, Lys 107, Tyr 288, Lys 106, Lys 191 and Asn 104                                                      |
| 13   | 2            | Lys 480, Arg 169, Gln 481, Thr 477, Thr 140, Arg 176, Asn 451, Glu 470, Tyr 172, Ser 454, Thr 483.                    |
| 14   | 1            | Lys 159, Thr 109, Gln 187, Asn 185, Lys 107, His 98, Lys 101                                                          |
| 15   | 1            | Gln163, Lys 155, Lys 84, Lys 161, Lys 90, Lys 137                                                                     |
| 16   | 1            | Asn 174, Tyr66, Tyr 175, Gln 444, Lys 71, Lys 81, Arg 533, Asn 69 and Arg 97                                          |
| 17   | 1            | Lys 161, Lys 84, Asn95, Lys 80, His 98                                                                                |

**Supplementary Table 2:** Rearrangement of binding pose based on binding orientation with different OppA proteins

| Binding complex | Lp_0018 | Lp_0092 | Lp_0200 | Lp_0201 | Lp_0783 | Lp_1261 | Lp_3686 |
|-----------------|---------|---------|---------|---------|---------|---------|---------|
| Complex 0       | Site 1  | Site 2  | Site 2  | Site 2  | Site 3  | Site 1  | Site 2  |
| Complex 1       | Site 1  | Site 2  | Site 2  | Site 2  | Site 3  | Site 1  | Site 2  |
| Complex 2       | Site 1  | Site 2  | Random  | Site 2  | Site 3  | Site 1  | Site 2  |
| Complex 3       | Site 1  | Site 2  | Random  | Site 4  | Site 3  | Site 1  | Site 2  |
| Complex 4       | Site 2  | Site 2  | Random  | Site 4  | Site 3  | Site 1  | Site 2  |
| Complex 5       | Site 1  | Site 1  | Site 1  | Site 2  | Site 3  | Site 1  | Site 2  |
| Complex 6       | Site 2  | Site 1  | Site 1  | Site 2  | Site 3  | Site 1  | Site 1  |
| Complex 7       | Site 1  | Site 2  | Random  | Site 4  | Site 1  | Site 1  | Site 2  |
| Complex 8       | Site 2  | Site 3  | Site 1  | Site 2  | Site 3  | Site 1  | Site 1  |
| Complex 9       | Site 1  | Site 1  | Site 1  | Site 4  | Site 3  | Site 1  | Site 2  |
| Complex 10      | Site 1  | Site 3  | Random  |         | Site 3  | Site 1  | Site 2  |
| Complex 11      | Site 1  | Site 2  | Random  |         | Site 3  | Site 1  | Site 1  |
| Complex 12      | Site 1  | Site 1  | Site 2  |         | Site 3  | Random  | Site 2  |
| Complex 13      | Site 2  | Site 1  | Site 1  |         |         | Random  | Site 2  |
| Complex 14      | Site 2  | Site 2  | Site 2  |         |         | Site 1  |         |
| Complex 15      | Site 1  | Site 3  | Site 1  |         |         | random  |         |
| Complex 16      | Site 1  | Site 3  | Random  |         |         | Site 1  |         |
| Complex 17      | Site 1  | Site 3  | Random  |         |         |         |         |
| Complex 18      |         | Site 1  | Random  |         |         |         |         |
| Complex 19      |         | Site 1  | Site 1  |         |         |         |         |
| Complex 20      |         | Site 1  | Site 1  |         |         |         |         |

**Supplementary Table 3:** Sequence and purification conditions of OppA proteins

| <b>Lane</b> | <b>OppA Proteins</b> | <b>Uniprot Entry</b> | <b>Sequence</b> | <b>Purification Condition</b>                         | <b>Elution Condition</b>                                 |
|-------------|----------------------|----------------------|-----------------|-------------------------------------------------------|----------------------------------------------------------|
| 1           | Lp_0018 SBD          | F9US48               | AA 70 to 538    | LB media, 100μM IPTG, 18°C incubation for 24 hours    | 1 M NaCl                                                 |
| 2           | Lp_0018              | F9US48               | AA 27 to 538    | LB media, 100μM IPTG, 25°C incubation for 24 hours    | 1 M NaCl                                                 |
| 3           | Lp_0092              | F9USS1               | AA 29 to 519    | TB auto-induction media, 30°C incubation for 24 hours | 0.5 M NaCl                                               |
| 4           | Lp_0200              | F9UT07               | AA 84 to 553    | LB media, 100μM IPTG, 25°C incubation for 24 hours    | 0.35 M NaCl (Further purification through nickel column) |
| 5           | Lp_0201              | F9UT08               | AA 39 to 553    | LB media, 100μM IPTG, 18°C incubation for 24 hours    | 0.9 M NaCl                                               |
| 6           | Lp_0783              | F9UM05               | AA 21 to 555    | LB media, 100μM IPTG, 25°C incubation for 24 hours    | 0.7 M NaCl                                               |
| 7           | Lp_1261              | F9UN51               | AA 31 to 547    | LB media, 100μM IPTG, 25°C incubation for 24 hours    | 0.8 M NaCl                                               |
| 8           | Lp_3686              | F9ULM7               | AA 36 to 545    | LB media, 100μM IPTG, 25°C incubation for 24 hours    | 0.8 M NaCl                                               |

**Supplementary Table 4:** Promoters characterized in *L. plantarum* WCFS1

| <b>Promoters</b> | <b>Origin and Source references</b>                            |
|------------------|----------------------------------------------------------------|
| P32              | <i>Lactococcus lactis</i> subsp. <i>lactis</i> N8 <sup>1</sup> |
| Ldhs             | <i>Lactobacillus sakei</i> <sup>2</sup>                        |
| Ldhp             | <i>Lactobacillus plantarum</i> WCFS1 <sup>3</sup>              |
| SlpA             | <i>Lactobacillus acidophilus</i> <sup>4</sup>                  |
| PGM              | <i>Lactobacillus acidophilus</i> <sup>5</sup>                  |
| P11              | Synthetic promoter for <i>L. plantarum</i> <sup>6</sup>        |
| Slp              | <i>Lactobacillus acidophilus</i> <sup>7</sup>                  |
| Puo19            | <i>Lactobacillus casei</i> phage <sup>8</sup>                  |
| ermB             | Promoter of Erythromycin resistance gene <sup>7</sup>          |
| P8               | <i>Lactococcus lactis</i> subsp. <i>lactis</i> N8 <sup>9</sup> |

## References

- 1 Cameron, D. E. & Collins, J. J. Tunable protein degradation in bacteria. *Nat Biotechnol* **32**, 1276-1281, (2014). <https://doi.org/10.1038/nbt.3053>
- 2 Bao, S. *et al.* Distribution dynamics of recombinant *Lactobacillus* in the gastrointestinal tract of neonatal rats. *PLoS One* **8**, e60007, (2013). <https://doi.org/10.1371/journal.pone.0060007>
- 3 Sasikumar, P. *et al.* Genetically engineered *Lactobacillus plantarum* WCFS1 constitutively secreting heterologous oxalate decarboxylase and degrading oxalate under in vitro. *Curr Microbiol* **69**, 708-715, (2014). <https://doi.org/10.1007/s00284-014-0644-2>
- 4 McCracken, A., Turner, M. S., Giffard, P., Hafner, L. M. & Timms, P. Analysis of promoter sequences from *Lactobacillus* and *Lactococcus* and their activity in several *Lactobacillus* species. *Arch Microbiol* **173**, 383-389, (2000). <https://doi.org/10.1007/s002030000159>
- 5 Duong, T., Miller, M. J., Barrangou, R., Azcarate-Peril, M. A. & Klaenhammer, T. R. Construction of vectors for inducible and constitutive gene expression in *Lactobacillus*. *Microb Biotechnol* **4**, 357-367, (2011). <https://doi.org/10.1111/j.1751-7915.2010.00200.x>
- 6 Rud, I., Jensen, P. R., Naterstad, K. & Axelsson, L. A synthetic promoter library for constitutive gene expression in *Lactobacillus plantarum*. *Microbiology (Reading)* **152**, 1011-1019, (2006). <https://doi.org/10.1099/mic.0.28599-0>
- 7 Lizier, M., Sarra, P. G., Cauda, R. & Lucchini, F. Comparison of expression vectors in *Lactobacillus reuteri* strains. *FEMS Microbiol Lett* **308**, 8-15, (2010). <https://doi.org/10.1111/j.1574-6968.2010.01978.x>
- 8 García, P., Bascarán, V., Rodríguez, A. & Suárez, J. E. Isolation and characterization of promoters from the *Lactobacillus casei* temperate bacteriophage A2. *Can J Microbiol* **43**, 1063-1068, (1997). <https://doi.org/10.1139/m97-151>
- 9 Zhu, D. *et al.* Isolation of strong constitutive promoters from *Lactococcus lactis* subsp. *lactis* N8. *FEMS Microbiol Lett* **362**, (2015). <https://doi.org/10.1093/femsle/fnv107>
